# Supplementary material for: Development of a survey instrument to measure patient experiences of care transitions from hospital to home with a focus on primary care’s role
Source: Research Square preprint supplement (doi:10.21203/rs.3.rs-5596308/v1), 2025-04-03
Supplement: Supplementary file 1 [file ab38b4052089ec4421ca51d6.xlsx]

## Sheet: Surveys QuestionsDomains
Survey	Understanding of Care	Tailored Discharge	Confidence in Care Management	Care Plan	Relationship in Hospital	Information Transfer	Relationships in Community	Management of Forms	Management of Follow-Up	Management of Communication	Other Questions (not part of factor analysis due to response rate)	Coordination within and between care teams	Navigation: Care team arranged appointments and visits	Communication between specialist and primary care doctor	Coordination with Community Resources	Communication between primary care doctor and specialist
	Blue font indicates connections to Logic Model outcomes
CTM New	Please rate your understanding of the things that can make your condition get better or worse (increased patient knowledge? self-efficacy/self-managment?)	Please rate your satisfaction with the level of involvement of a family member or other caregiver in planning your care after discharge. (Improved patient and family experience)	Please rate your confidence in your ability to take care of your health condition. (Increase in patient self-efficacy with self-management)	Please rate the matching of the discharge care plan to the level of your insurance coverage. N/A
CTM New	Please rate your understanding of who was available to assist you with your care and recovery after discharge. (patient knowledge; shift from acute care to community care)	Please rate your satisfaction with the content and clarity of your written discharge instructions. (increased patient knowledge?Improved patient and family experience; improved patient safety?)	Please rate your confidence in your ability to manage your medications, such as remembering to take them all and take them at the right time. (Increase in patient self-efficacy with self-management, improved patient safety)	Please rate the matching of the discharge care plan to the level of support you have from family, friends and others during your recovery. (shift from acute care to primary care? Not sure there is a great match currently in the logic model)
CTM New	Please rate your understanding of how to take care of your health after discharge from the hospital. (Increase in patient self-efficacy with self-management; patient knowledge)	Please rate your satisfaction with the arrangement of medical services after discharge such as: visiting nurses, home physical therapy, infusion services. (shift from acute care to community care, improved integration and coordination across acute and primary care, improved informational and management continuity across settings; Improved patient and family experience)	Please rate your confidence in your ability to schedule, keep track of, and attend your follow-up appointments. (Increase in patient self-efficacy with self-management), shift from acute care to community care?)	Please rate the matching of the discharge care plan to your access to transportation to get to/from follow-up appointments. (no direct item in logic modeol increase in patent follow-ups with PHC team...)
PCCQ					How strongly do you agree or disagree with this statement? 21. [Before discharge] I was satisfied with the emotional support from the providers involved in my care.(improved patient and family experience)	" " 4. [Before discharge] I was given information on symptoms that may signal a need to seek urgent medical attention & whom to contact for these symptoms (e.g. specialist, family physician, homecare). (increased patient knowledge; improved patient safety)	" " 29. [After discharge] I have confidence in my providers who have taken over my care since discharge. (no direct item about patient confidence in the system; improved integration and coordination across acute and primary care; improved patient and family experience)	" " 39. [After discharge] As far as I am aware, necessary forms were all completed. (improved informational and management continuity across settings)	" " 10. [Before discharge] I was given information on follow-up appointments that have been made for me and appointments I have to schedule for myself. (no specific item in logic model; increase in patient follow-ups with PHC; increase in patient knowledge - minor connection; shift from acute care to community care)	" " 33. [After discharge] As far as I am aware, the different health care providers in hospital have communicated well with those in the community about my care. (improved integration and coordination across acute and primary care)	[Before discharge] 5. I was told about clinical findings that may impact my future health or care (e.g. history of blood clots, cancer, high blood pressure). (increased patient knowledge)
PCCQ					" " 19. [Before discharge] I had confidence in the providers involved in my care. (no direct logic model outcome attached to confidence in providers)	" " 1. [Before discharge] I was provided with clear information on my diagnosis. (increased patient knowledge)	" " 30. [After discharge] I am satisfied with the information from my providers who have taken over my care since discharge. (informational continuity)	" " 40. {After discharge] As far as I am aware, necessary forms were sent to all appropriate places/providers. (improved informational and management continuity across settings)	12. [Before discharge] I was informed of ongoing treatment that may be required after discharge (e.g., purpose, how, when) and whether I will have ongoing contact with providers of my care (e.g., physician, etc.). (increased patient knowledge; increase in patient self-efficacy with self-management; improved patient safety)	" " 23. [Before discharge] The different providers appeared to communicate well with each other while I was in hospital/convalescent care. (improved informational and management continuity across settings; improved integration and coordination across acute and PC)	[Before discharge] 7. I was given dietary instructions (e.g., requirements, restrictions, instructions to plan daily meals). (increased patient knowledge)
PCCQ					" " 17. [Before discharge] providers understood my expectations, beliefs and preferences. (care aligned with patient preferences)	" " 6. [Before discharge] I was given complete information on my medications (e.g., type, purpose, how given, when, how often for how long, how much, side effects, drug interactions, nature and frequency of blood work). (increased patient knowledge; self-efficacy?)	" " 32. [After discharge] I am satisfied with the opportunity to talk and raise questions with my providers who have taken over my care since discharge. (improved patient and family experience; increased patient knowledge?	" " 41. {After discharge] As far as I am aware, no forms or information were lost when I was discharged. (informational and management continuity)	" " 24. [Before discharge] A well-developed and realistic follow-up plan was prepared and explained to me. (increased patient knowledge; may fit 'care aligned with patient preferences' as they are referring to a realistic follow-up plan; increase in patient self-efficacy with self-management)	" " 34. [After discharge] As far as I am aware, my family physician or other key provider was contacted and informed about the important aspects of care that I received (e.g. diagnosis, prognosis, treatment, medications, etc.). (improved informational and management continuity across settings; improved integration and coordination across acute and PC)	[Before discharge] 9. I was given information on medical equipment and supplies (e.g., what needed, whom to contact). (increased patient knowledge; increase in patient self-efficacy with self-management?)
PCCQ					" " 18. [Before discharge] I felt “known” (e.g. current clinical condition and events) by the providers involved in my care. (no direct logic model outcome attached to confidence in providers)	" " 2. [Before discharge] I was provided with clear information on my prognosis. (increased patient knowledge)	" " 28. [After discharge] I feel “known” (e.g. current health condition) by my present providers who have taken over my care since discharge. (improved integration and coordination...; improved informational and management continuity across settings; improved patient and family experience?)			" " 8. [Before discharge] I was provided with information on recommendations and restrictions in activities, exercises and aids. (increased patient knowledge; increase in patient self-efficacy with self- management)	[Before discharge] 11. I was given written information on recommended support services (e.g., Home Care, Respite, Adult Day Program) and target date for initial contact. (increased patient knowledge; shift from acute care to community care)
PCCQ					" " 20. [Before discharge] I was satisfied with the information from the providers involved in my care. (improved patient and family experience - focus on info)	" " 3. [Before discharge] I was told about non-urgent symptoms that may occur and how I should cope with these. (increased patient knowledge; self-management - not quite getting at perceived self-efficacy)					[Before discharge] 13. I was informed of patient resources/supports (e.g., peer support groups) that may be available. (increased patient knowledge; shift from acute care to community care)
PCCQ					" " 22. [Before discharge] I was satisfied with the opportunity to talk and raise questions with the providers involved in my care. (improved patient and family experience; increased patient knowledge)	" " 37. [After discharge] I was given consistent information by all providers about my care. (improved informational and management continuity across settings)					[Before discharge] 14. I was informed of different self management tools and educational material (e.g., diaries, books, tapes, videos) that could be helpful to me. (increased patient knowledge; increase in patient self-efficacy with self-managment)
PCCQ					" " 27. [Before discharge] I felt adequately prepared for discharge. (patient self-efficacy the closest but this is really about readiness)						[Before discharge] 15. My informal caregivers (e.g., family, friends) were given information on resources/support (e.g., peer support groups, community organizations). (increased patient knowledge; increase in patient self-efficacy with self-managment)
PCCQ											[Before discharge] 16. My informal caregivers had the necessary information about my health that they needed in order to help me out. (logic model does not have caregiver focused outcome on info needs)
PCCQ											[Before discharge] 25. I was involved in and agreed with the follow-up plan. (care aligned with patient preferences)
PCCQ											[Before discharge] 26. My family was involved in follow-up as appropriate. (no clear logic model outcome for this)
PCCQ											[After discharge] 31. I am satisfied with the emotional support from my providers who have taken over my care since discharge. (improved patient and family experience)
PCCQ											[After discharge] 35. I have reviewed my overall treatment plan with my family physician since my discharge (no specific logic model outcomes around specifics of the follow-up visit; could fall under increased patient knowledge? or possibly improved integration and coordination across acute care and PC or info continuity and management across settings)
PCCQ											[After discharge] 36. The follow-up plan has been followed or adjusted as necessary (improved integration and coordination across acute and PC?)
PCCQ											[After discharge] 38. I was reminded about important appointments (e.g., letter, phone call). (patient self-efficacy and self-management?; shift from acute care to community care?)
Integrated Care Survey												6. In the last 12 months, when receiving care for a medical problem, how often did you receive conflicting or disagreeing information from different doctors? (integration and coordination acriss acute and PC; info continuity and management across settings)	34. In the past 12 months, how often [does your regular doctor or staff/do doctors or their staff] help schedule your appointments, referrals or tests? (activity that would be related to patient attendance at follow-up visits in the logic model and improved coordination)	45. In the last 12 months, after you saw the specialists how often did your [regular doctor/ doctors] know what happened at your visit with the specialist? (integration and coordination acriss acute and PC; info continuity and management across settings)	73. When you need care or treatment, how often [does your regular doctor or medical staff/do doctors or their medical staff] discuss with you different places you could go to get help with that problem or concern? (increased patient knowledge; shift to community care)	42. In the last 12 months, how often did you feel the specialists you saw had all the information they needed from your medical history? (info continuity and management across settings)
Integrated Care Survey												7. In the last 12 months, how often did you have to repeat yourself, or explain your problem again, to different doctors? (integration and coordination acriss acute and PC; info continuity and management across settings)	68. If you needed another visit with your regular doctor, how often did the staff do everything they could to make necessary arrangements or appointments?	46. In the last 12 months, after you saw the specialists how often did your [regular doctor/ doctors] seem informed and up-to-date about the care you got from the specialists? (integration and coordination across acute and PC; info continuity and management across settings)	67. How often [does your regular doctor/do your doctors] help you find additional health related services, if you so choose? (no clear logic model outcome - part of follow-up visit and or shift to community care?)	43. In the last 12 months, when you saw a specialist, how often were you given enough information about why you were there by your [regular doctor/doctors]? (increased patient knowledge?)
Integrated Care Survey												8. In the last 12 months, how often were you confused because different doctors told you different things? (integration and coordination acriss acute and PC; info continuity and management across settings)	69. If you needed another visit with another doctor,how often did the staff do everything they could to make necessary arrangements or appointments? (improved coordination)	48. In the last 12 months, after you saw a specialist, how often did your [regular doctor/doctors] talk with you about what happened at the visit? (no clear logic model outcome - could be related to follow-ups, integration, other?)		44. In the last 12 months, when seeing the specialists how often did he or she have enough information from your [regular doctor/doctors]? (info continuity and management across settings)
Integrated Care Survey												29. In the last 12 months, how often did [your regular doctor/ doctors] seem to know the important information about your medical history? (integration and coordination acriss acute and PC; info continuity and management across settings)	70. If you needed lab or radiology tests scheduled, how often did the staff do everything they could to make necessary arrangements or appointments? (improved coordination)
Integrated Care Survey												30. When you need care or treatment, how often [does your regular doctor or medical staff/do doctors or their medical staff] you see know important information about your medical history? (integration and coordination acriss acute and PC; info continuity and management across settings)	71. If you needed another visit with your regular or another doctor, how often did the staff do everything they could to make necessary arrangements when you thought you needed it? (care aligned with patient preferences)
Integrated Care Survey												73. In the last 12 months, how often have you felt your time was wasted because your care was poorly organized or poorly coordinated? (integration and coordination acriss acute and PC)	72. If you needed another visit with your regular or another doctor, how often did the staff do everything they could to make necessary arrangements at your preferred location? (care aligned with patient preferences)
Integrated Care Survey												74. In the last 12 months, how often have you had trouble getting your doctors coordinated? (integration and coordination acriss acute and PC)

## Sheet: PrePost Discharge Groupings
Survey	Questions re: experience in hospital	Questions re: experience post-discharge	Questions re: experience non-specific
CTM New		Please rate your understanding of who was available to assist you with your care and recovery after discharge.	Please rate your understanding of the things that can make your condition get better or worse
CTM New		Please rate your understanding of how to take care of your health after discharge from the hospital.	Please rate the matching of the discharge care plan to the level of your insurance coverage.
CTM New		Please rate your satisfaction with the level of involvement of a family member or other caregiver in planning your care after discharge.	Please rate your confidence in your ability to take care of your health condition.
CTM New		Please rate your satisfaction with the arrangement of medical services after discharge such as: visiting nurses, home physical therapy, infusion services.	Please rate your confidence in your ability to manage your medications, such as remembering to take them all and take them at the right time.
CTM New		Please rate your confidence in your ability to schedule, keep track of, and attend your follow-up appointments.
CTM New		Please rate the matching of the discharge care plan to the level of support you have from family, friends and others during your recovery.
		Please rate the matching of the discharge care plan to your access to transportation to get to/from follow-up appointments.
		Please rate your satisfaction with the content and clarity of your written discharge instructions.
PCCQ	How strongly do you agree or disagree with this statement? 21. [Before discharge] I was satisfied with the emotional support from the providers involved in my care.	" " 37. [After discharge] I was given consistent information by all providers about my care.
PCCQ	" " 19. [Before discharge] I had confidence in the providers involved in my care.	" " 29. [After discharge] I have confidence in my providers who have taken over my care since discharge.
PCCQ	" " 17. [Before discharge] providers understood my expectations, beliefs and preferences.	" " 30. [After discharge] I am satisfied with the information from my providers who have taken over my care since discharge.
PCCQ	" " 18. [Before discharge] I felt “known” (e.g. current clinical condition and events) by the providers involved in my care.	" " 32. [After discharge] I am satisfied with the opportunity to talk and raise questions with my providers who have taken over my care since discharge.
PCCQ	" " 20. [Before discharge] I was satisfied with the information from the providers involved in my care.	" " 28. [After discharge] I feel “known” (e.g. current health condition) by my present providers who have taken over my care since discharge.
PCCQ	" " 22. [Before discharge] I was satisfied with the opportunity to talk and raise questions with the providers involved in my care.	" " 39. [After discharge] As far as I am aware, necessary forms were all completed.
PCCQ	" " 27. [Before discharge] I felt adequately prepared for discharge.	" " 40. {After discharge] As far as I am aware, necessary forms were sent to all appropriate places/providers.
PCCQ	" " 4. [Before discharge] I was given information on symptoms that may signal a need to seek urgent medical attention & whom to contact for these symptoms (e.g. specialist, family physician, homecare).	" " 41. {After discharge] As far as I am aware, no forms or information were lost when I was discharged.
PCCQ	" " 1. [Before discharge] I was provided with clear information on my diagnosis.	" " 33. [After discharge] As far as I am aware, the different health care providers in hospital have communicated well with those in the community about my care.
PCCQ	" " 6. [Before discharge] I was given complete information on my medications (e.g., type, purpose, how given, when, how often for how long, how much, side effects, drug interactions, nature and frequency of blood work).	" " 34. [After discharge] As far as I am aware, my family physician or other key provider was contacted and informed about the important aspects of care that I received (e.g. diagnosis, prognosis, treatment, medications, etc.).
PCCQ	" " 2. [Before discharge] I was provided with clear information on my prognosis.	[After discharge] 31. I am satisfied with the emotional support from my providers who have taken over my care since discharge.
PCCQ	" " 3. [Before discharge] I was told about non-urgent symptoms that may occur and how I should cope with these.	[After discharge] 35. I have reviewed my overall treatment plan with my family physician since my discharge
PCCQ	" " 10. [Before discharge] I was given information on follow-up appointments that have been made for me and appointments I have to schedule for myself.	[After discharge] 36. The follow-up plan has been followed or adjusted as necessary
PCCQ	12. [Before discharge] I was informed of ongoing treatment that may be required after discharge (e.g., purpose, how, when) and whether I will have ongoing contact with providers of my care (e.g., physician, etc.).	[After discharge] 38. I was reminded about important appointments (e.g., letter, phone call).
PCCQ	" " 24. [Before discharge] A well-developed and realistic follow-up plan was prepared and explained to me.
PCCQ	" " 23. [Before discharge] The different providers appeared to communicate well with each other while I was in hospital/convalescent care.
PCCQ	" " 8. [Before discharge] I was provided with information on recommendations and restrictions in activities, exercises and aids.
PCCQ	[Before discharge] 5. I was told about clinical findings that may impact my future health or care (e.g. history of blood clots, cancer, high blood pressure).
PCCQ	[Before discharge] 7. I was given dietary instructions (e.g., requirements, restrictions, instructions to plan daily meals).
PCCQ	[Before discharge] 9. I was given information on medical equipment and supplies (e.g., what needed, whom to contact).
PCCQ	[Before discharge] 11. I was given written information on recommended support services (e.g., Home Care, Respite, Adult Day Program) and target date for initial contact.
PCCQ	[Before discharge] 13. I was informed of patient resources/supports (e.g., peer support groups) that may be available.
PCCQ	[Before discharge] 14. I was informed of different self management tools and educational material (e.g., diaries, books, tapes, videos) that could be helpful to me.
PCCQ	[Before discharge] 15. My informal caregivers (e.g., family, friends) were given information on resources/support (e.g., peer support groups, community organizations).
PCCQ	[Before discharge] 16. My informal caregivers had the necessary information about my health that they needed in order to help me out.
PCCQ	[Before discharge] 25. I was involved in and agreed with the follow-up plan.
PCCQ	[Before discharge] 26. My family was involved in follow-up as appropriate.
Integrated Care Survey			6. In the last 12 months, when receiving care for a medical problem, how often did you receive conflicting or disagreeing information from different doctors?
Integrated Care Survey			7. In the last 12 months, how often did you have to repeat yourself, or explain your problem again, to different doctors?
Integrated Care Survey			8. In the last 12 months, how often were you confused because different doctors told you different things?
Integrated Care Survey			29. In the last 12 months, how often did [your regular doctor/ doctors] seem to know the important information about your medical history?
Integrated Care Survey			30. When you need care or treatment, how often [does your regular doctor or medical staff/do doctors or their medical staff] you see know important information about your medical history?
Integrated Care Survey			73. In the last 12 months, how often have you felt your time was wasted because your care was poorly organized or poorly coordinated?
Integrated Care Survey			74. In the last 12 months, how often have you had trouble getting your doctors coordinated?
Integrated Care Survey			34. In the past 12 months, how often [does your regular doctor or staff/do doctors or their staff] help schedule your appointments, referrals or tests?
Integrated Care Survey			68. If you needed another visit with your regular doctor, how often did the staff do everything they could to make necessary arrangements or appointments?
Integrated Care Survey			69. If you needed another visit with another doctor,how often did the staff do everything they could to make necessary arrangements or appointments?
Integrated Care Survey			70. If you needed lab or radiology tests scheduled, how often did the staff do everything they could to make necessary arrangements or appointments?
Integrated Care Survey			71. If you needed another visit with your regular or another doctor, how often did the staff do everything they could to make necessary arrangements when you thought you needed it?
Integrated Care Survey			72. If you needed another visit with your regular or another doctor, how often did the staff do everything they could to make necessary arrangements at your preferred location?
Integrated Care Survey			45. In the last 12 months, after you saw the specialists how often did your [regular doctor/ doctors] know what happened at your visit with the specialist?
Integrated Care Survey			46. In the last 12 months, after you saw the specialists how often did your [regular doctor/ doctors] seem informed and up-to-date about the care you got from the specialists?
Integrated Care Survey			48. In the last 12 months, after you saw a specialist, how often did your [regular doctor/doctors] talk with you about what happened at the visit?
Integrated Care Survey			73. When you need care or treatment, how often [does your regular doctor or medical staff/do doctors or their medical staff] discuss with you different places you could go to get help with that problem or concern?
Integrated Care Survey			67. How often [does your regular doctor/do your doctors] help you find additional health related services, if you so choose?
Integrated Care Survey			42. In the last 12 months, how often did you feel the specialists you saw had all the information they needed from your medical history?
Integrated Care Survey			43. In the last 12 months, when you saw a specialist, how often were you given enough information about why you were there by your [regular doctor/doctors]?
Integrated Care Survey			44. In the last 12 months, when seeing the specialists how often did he or she have enough information from your [regular doctor/doctors]?
